# Supplementary material for: Magnetic Halloysite Nanotube-Based SERS Biosensor Enhanced with Au@Ag Core–Shell Nanotags for Bisphenol A Determination
Source: Biosensors (Basel). 2022 Jun 2;12(6):387. doi: 10.3390/bios12060387 (PMC9221462; doi:10.3390/bios12060387)
Supplement: Supplementary file 1 [file biosensors-12-00387-s001.zip › biosensors-1733844-supplementary.pdf]

## **Supplementary Files**

### **Magnetic Halloysite Nanotubes based SERS Biosensor Enhanced with Au@Ag Core-Shell Nanotags for Bisphenol A Determination**

Sen Li,<sup>a</sup> Defu He<sup>a,b</sup>, Shuning Li<sup>a,c</sup>, Ruipeng Chen<sup>a,c</sup>, Yuan Peng<sup>a</sup>, Shuang Li<sup>a</sup>, Dianpeng Han<sup>a</sup>, Yu Wang<sup>a</sup>, Kang Qin<sup>a</sup>, Shuyue Ren<sup>a</sup>, Ping Chen<sup>b\*</sup>, Zhixian Gao<sup>a\*</sup>

<sup>a</sup> Tianjin Key Laboratory of Risk Assessment and Control Technology for Environment and Food Safety, Tianjin Institute of Environmental and Operational Medicine, Tianjin 300050, China

<sup>b</sup> School of Food Science and Engineering, Jilin Agricultural University, Changchun 130118, China

<sup>c</sup> State Key Laboratory of Food Nutrition and Safety, Tianjin University of Science & Technology, Tianjin 300457, China

\* Corresponding Author: gaozhx@163.com; ccchenping@sina.com

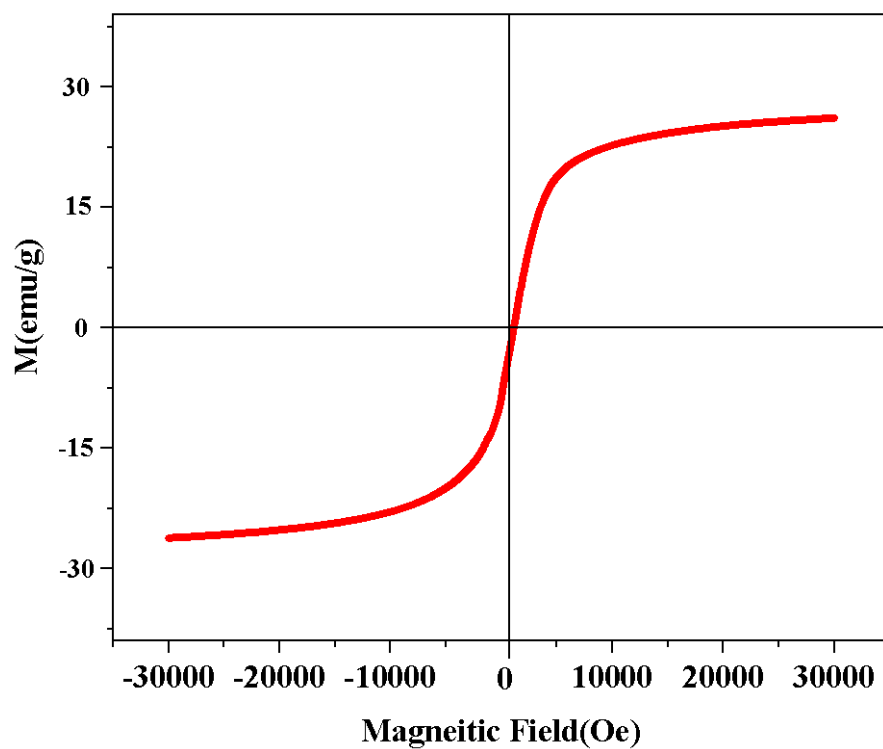

Figure S1. Hysteresis curves for MNTs@AuNPs.

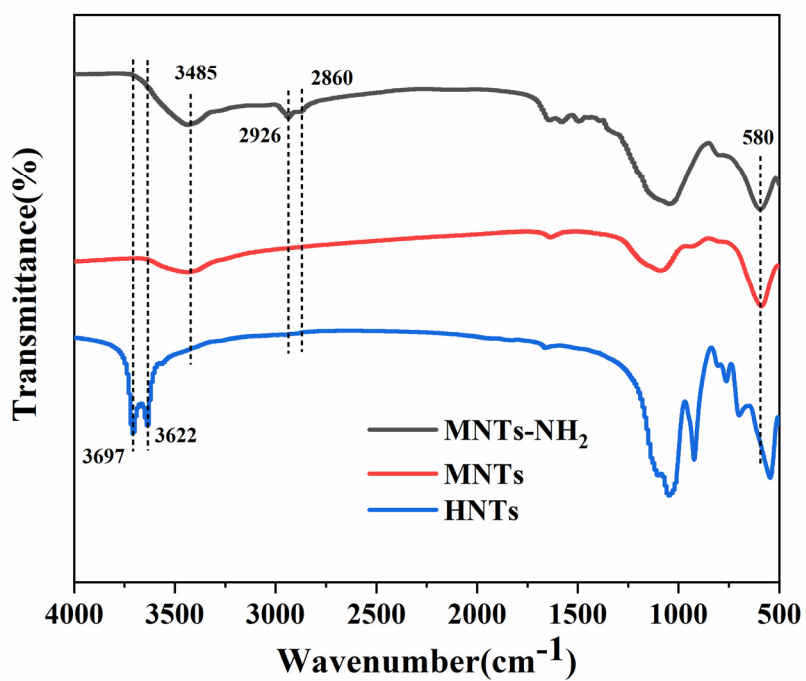

Figure S2. FTIR spectra of HNTs, MNTs and MNTs-NH<sub>2</sub>.

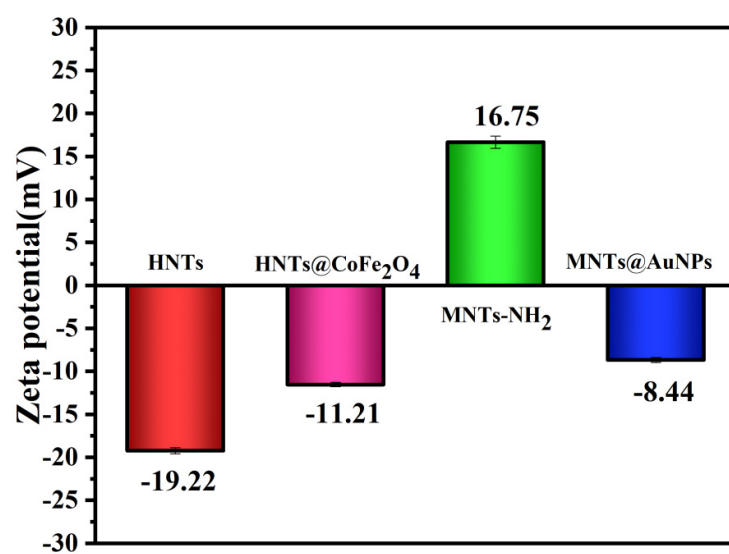

Figure S3. Zeta potential of HNTs, MNTs and MNTs-NH<sub>2</sub> and MNTs@AuNPs.

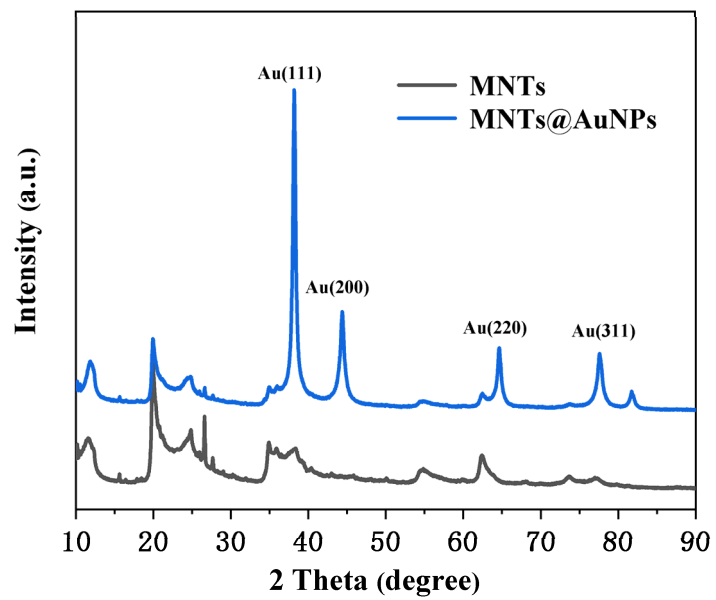

**Figure S4. X-ray diffraction patterns of MNTs and MNTs@AuNPs.**

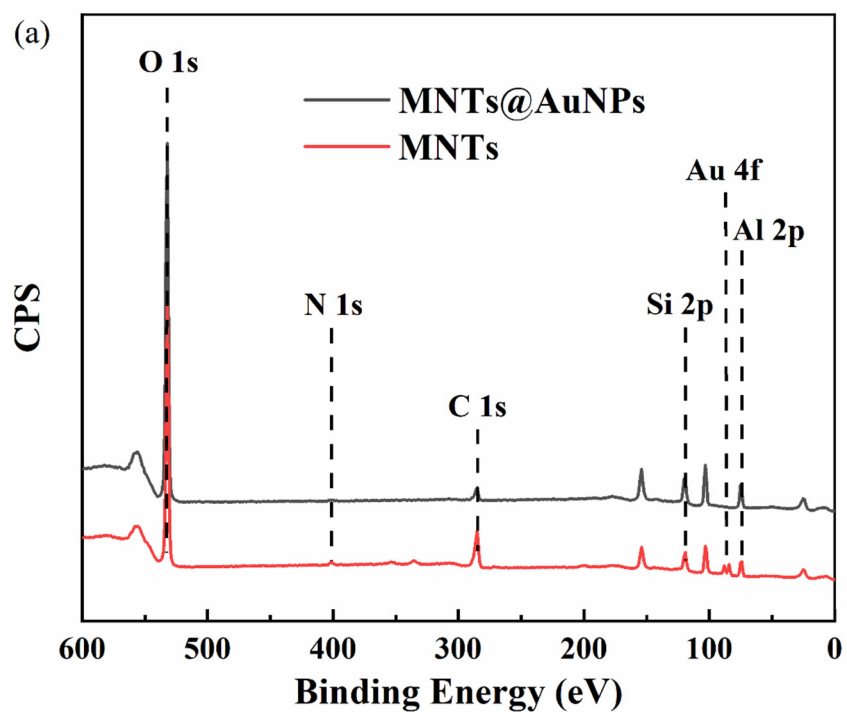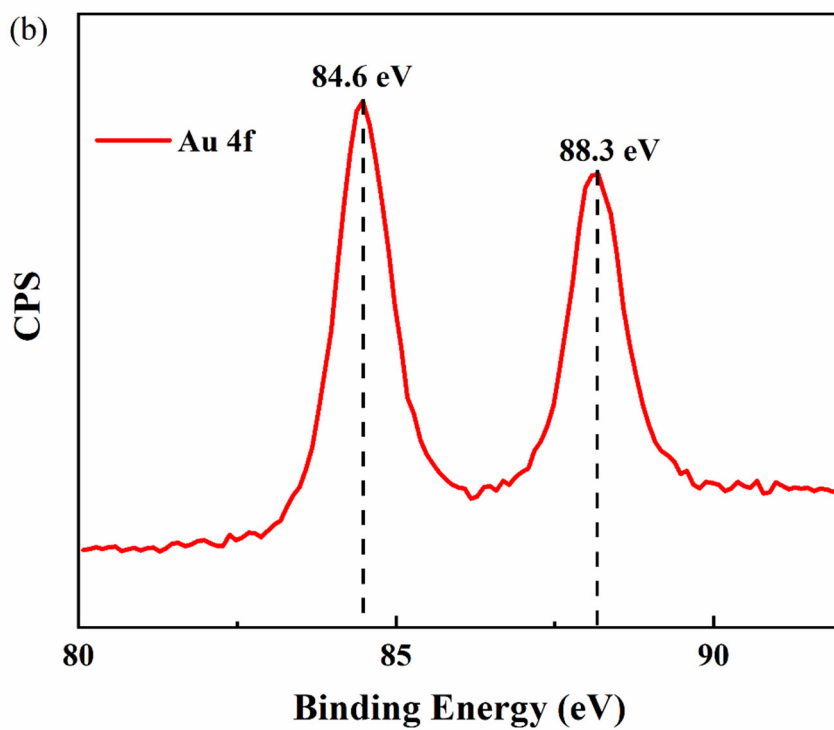

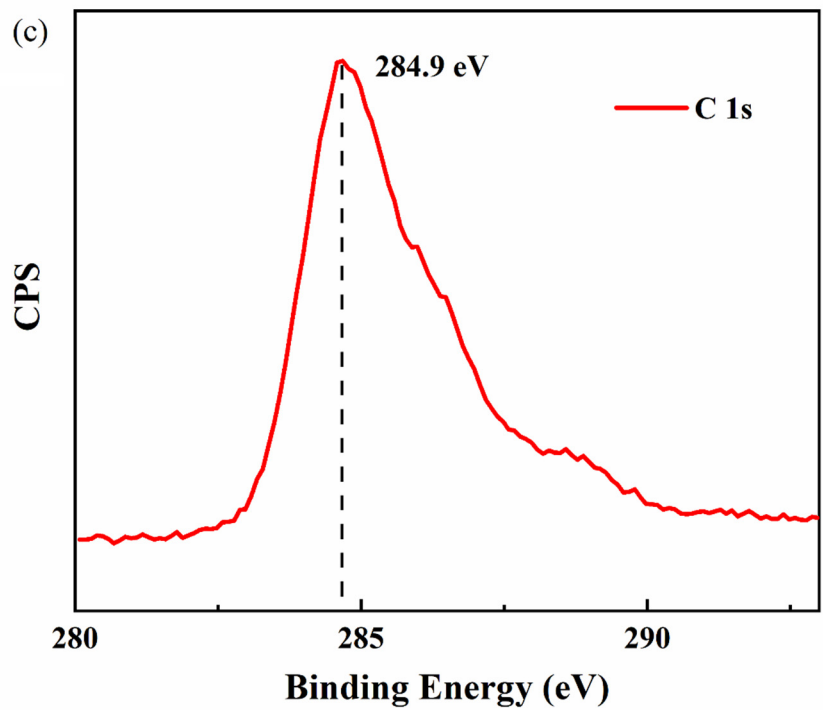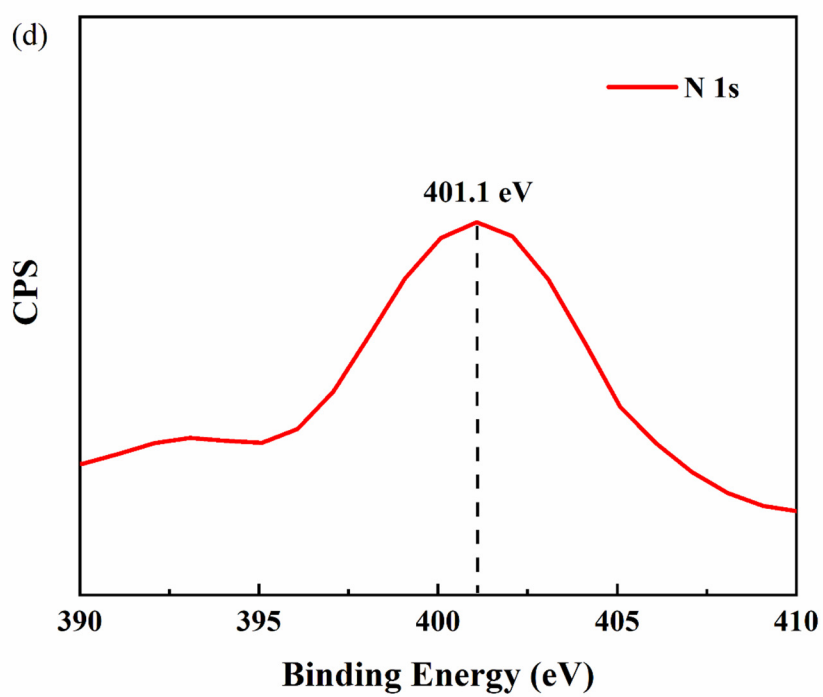

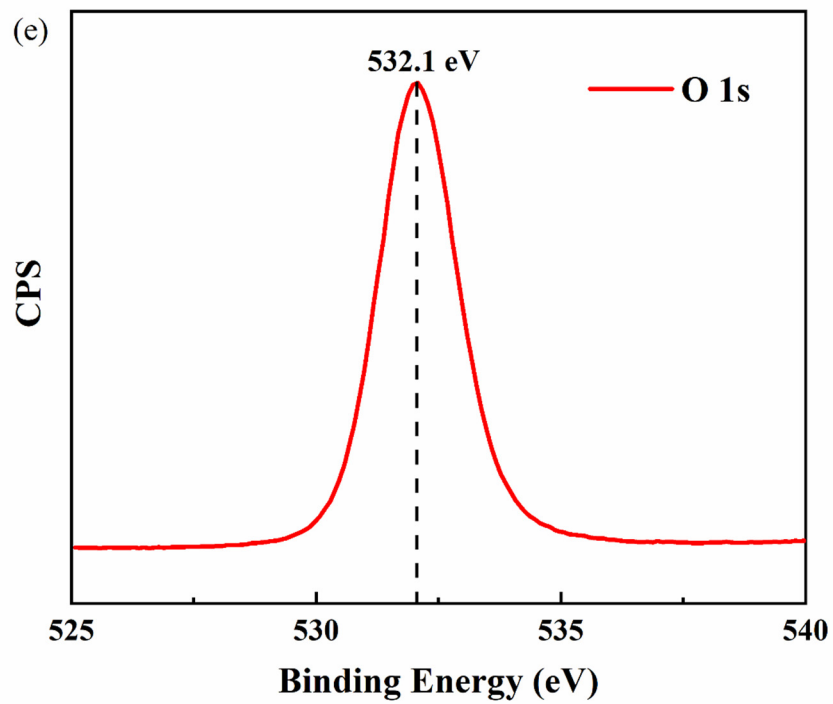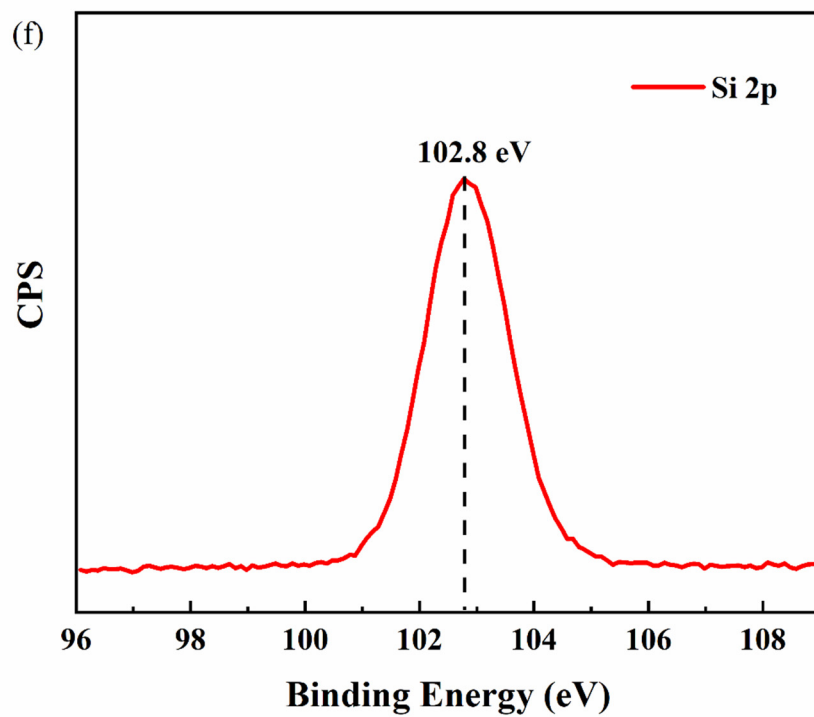

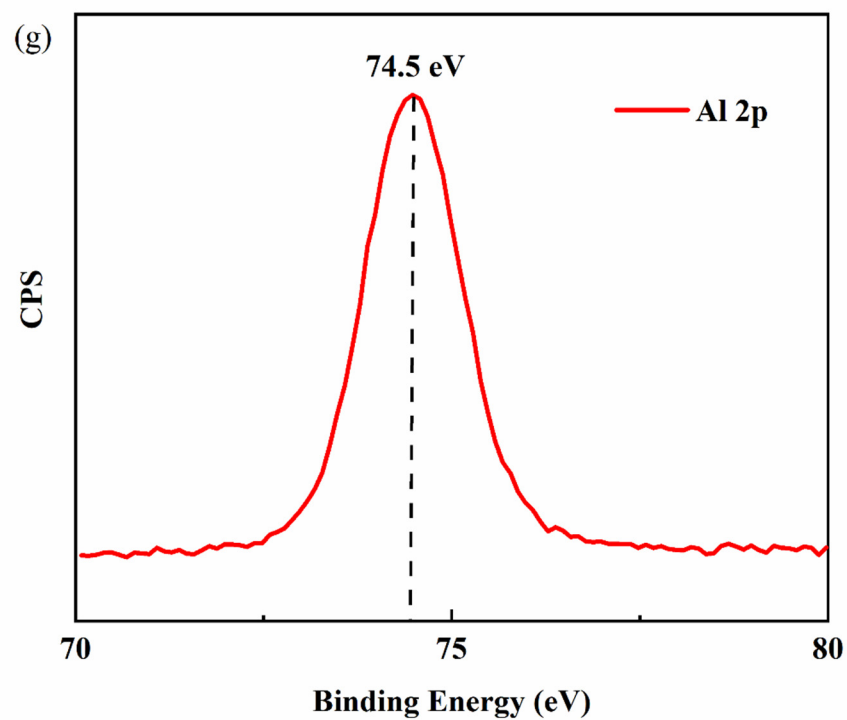

**Figure S5. (a) X-ray photoelectron spectra of MNTs and MNTs@AuNPs. (b-g) XPS scan curves for the Au, C, N, O, Si, and Al elements in MNTs@AuNPs.**

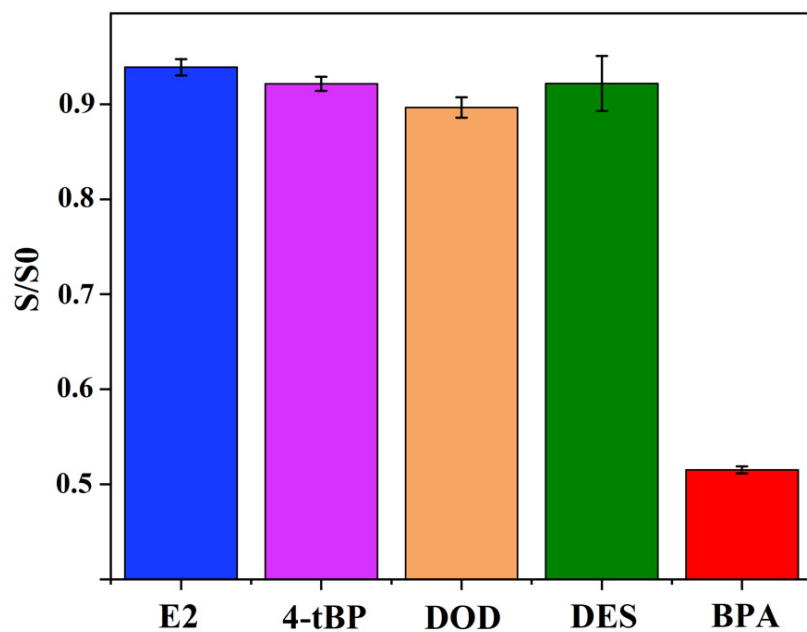

**Figure S6.** Comparison of Raman peak intensities at  $1077\text{ cm}^{-1}$  for estradiol (E2), 4-tert-butylpyridine (4-tBP), 4,4'-dihydroxybiphenyl (DOD), hexenestrol (DES), and bisphenol A (BPA) by the reporter probes. The SERS intensities of the experimental group (S) and the control group (S0) were detected. Error bars indicate the standard deviation of the three replicate experiments.
